# Supplementary material for: Dependency of the regio- and stereoselectivity of intramolecular, ring-closing glycosylations upon the ring size
Source: publisher site journal article supplement (doi:10.3762/bjoc.7.189), 2011-12-01
Supplement: Additional file 1 [file 1860-5397-7-189-S1.pdf]

# Supporting Information

## for

### Dependency of the regio- and stereoselectivity of intramolecular, ring-closing glycosylations upon the ring size

Patrick Claude<sup>1</sup>, Christian Lehmann<sup>2</sup> and Thomas Ziegler<sup>\*1</sup>

Address: <sup>1</sup>Institute of Organic Chemistry, University of Tuebingen, Auf der Morgenstelle 18, 72076 Tuebingen, Germany and <sup>2</sup>Institute for Organic Chemistry, University of Lausanne BCH-Dorigny, CH-1015 Lausanne, Switzerland

Email: Thomas Ziegler<sup>\*</sup> - thomas.ziegler@uni-tuebingen.de; Christian Lehmann - lehmannc.3d@a3.epfl.ch

<sup>\*</sup> Corresponding author

## Experimental Data

### General

All solvents were dried and distilled prior to their use. Reactions were performed under Ar and monitored by TLC on Polygram Sil G/UV silica gel plates from Machery & Nagel. Detection was effected by charring with H<sub>2</sub>SO<sub>4</sub> (5% in EtOH) or by inspection of the TLC plates under UV light. NMR spectra were recorded on a Bruker ARX 250 spectrometer at 100 MHz for proton spectra and at 62.9 MHz for carbon spectra, and on a Bruker Avance 400 spectrometer at 400 MHz for proton spectra and at 100 MHz for carbon spectra. Tetramethylsilane was used as the internal standard. ESI-HRMS was performed on a Bruker FT-ICR spectrometer. FAB-HRMS was performed on a Finnigan MAT 65 spectrometer. Elemental analyses were performed on a Hekatech Euro 3000 CHN analyzer. Optical rotations were measured with a Perkin-Elmer Polarimeter 341. Preparative chromatography was performed on silica gel (0.032–0.063 mm) from Machery & Nagel with different mixtures of solvents as eluent.

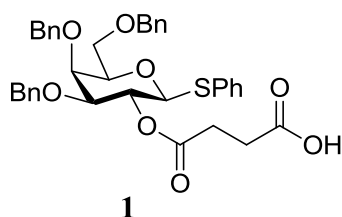

**Phenyl 3,4,6-Tri-*O*-benzyl-2-*O*-(3-carboxypropionyl)-1-thio-β-D-galactopyranoside (**1**)**

A solution of phenyl 3,4,6-tri-*O*-benzyl-1-thio-β-D-galactopyranoside [**1**] (11.5 g, 22 mmol), succinic anhydride (22 g, 0.22 mol) and a catalytic amount of DMAP (ca. 20 mg) in pyridine (270 mL) was stirred at 100 °C for 22.5 h. The mixture was concentrated and coevaporated with toluene. The residue was dissolved in CH<sub>2</sub>Cl<sub>2</sub> (300 mL), washed successively with ice-cold 1 N aqueous HCl solution (3 × 100 mL) and saturated aqueous NaHCO<sub>3</sub> solution (2 × 100 mL), dried with Na<sub>2</sub>SO<sub>4</sub>, filtered and concentrated. Chromatography (toluene/acetone 8:1 v/v containing 0.1 vol % acetic acid) of the residue afforded **1** (8.3 g, 60%) as a colorless foam:  $[\alpha]_D +12.5$  (c 1.0, chloroform); <sup>1</sup>H NMR (CDCl<sub>3</sub>) δ 7.49–7.00 (m, 20H, Ph-H), 5.39 (t, 1H, *J*<sub>1,2</sub> = 9.7 Hz, *J*<sub>2,3</sub> = 9.7 Hz, H-2), 4.86 (d, 1H, *J* = –11.6 Hz, CH<sub>2</sub>Ph), 4.61–4.32 (m, 6H, H-1, CH<sub>2</sub>Ph), 3.92–3.50 (m, 5H, H-3,4,5,6a,6b), 2.56–2.53 (m, 4H, CH<sub>2</sub>); <sup>13</sup>C NMR (CDCl<sub>3</sub>) δ 177.8 (COOH), 170.9 (COO), 86.6 (C-1), 81.4 (C-3), 77.6 (C-5), 74.4, 73.6, 72.1 (CH<sub>2</sub>Ph), 73.0 (C-4), 70.0 (C-2), 68.9 (C-6), 29.1, 28.9 (CH<sub>2</sub>); Anal. calcd for C<sub>37</sub>H<sub>38</sub>O<sub>8</sub>S (642.8): C, 69.14; H, 5.96; found: C, 68.99; H, 5.94.

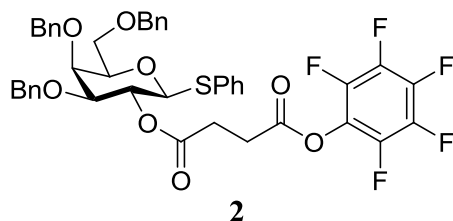

**Phenyl 3,4,6-Tri-*O*-benzyl-2-*O*-(3-pentafluorophenoxycarbonylpropionyl)-1-thio-β-D-galactopyranoside (**2**)**

Dicyclohexyl carbodiimide (2.74 g, 13.3 mmol) was added at 0 °C to a solution of compound **1** (8.3 g, 13.3 mmol) and pentafluorophenol (2.44 g, 13.4 mmol) in ethyl acetate (120 mL), and the mixture was stirred at 0 °C for 12 h. The mixture was warmed to room temperature and concentrated in vacuo. Recrystallization of the residue from EtOH/*n*-hexane gave **2** (9.3 g, 87%) as colorless crystals: mp 75–77 °C (EtOH/*n*-hexane);  $[\alpha]_D +133$  (c 1.0, chloroform); <sup>1</sup>H NMR (CDCl<sub>3</sub>) δ 7.48–7.18 (m, 20 H, Ph-H), 5.45 (dd, 1H, *J*<sub>1,2</sub> = 9.6 Hz, *J*<sub>2,3</sub> = 9.9 Hz, H-2), 4.95 (d, 2H, *J* = –11.6 Hz, CH<sub>2</sub>Ph), 4.60–4.410, (m, 6H, H-1, CH<sub>2</sub>Ph), 4.01 (d, 1H, *J*<sub>2,3</sub> =

2.8 Hz, H-4), 3.70–3.58 (m, 4H, H-5, 6a, 6b, H-3), 2.98–2.95 (m, 2H, CH<sub>2</sub>Ph), 2.79–2.61 (m, 2H, CH<sub>2</sub>Ph). <sup>13</sup>C NMR (CDCl<sub>3</sub>) δ 169.9, 168.2 (COO), 86.4 (C-1), 81.5 (C-3), 77.6 (C-5), 74.4, 73.6, 72.1 (CH<sub>2</sub>Ph), 72.9 (C-4), 70.4 (C-2), 68.7 (C-6), 28.9, 28.3 (CH<sub>2</sub>COO); HRMS-FAB (*m/z*) calcd for C<sub>43</sub>H<sub>37</sub>O<sub>8</sub>SF<sub>5</sub>Na<sup>+</sup>: 831.2022; found: 831.2050.

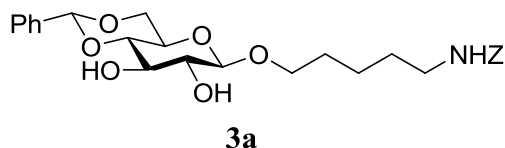

#### 5-(Benzyloxycarbonylamino)pentyl 4,6-*O*-benzylidene-β-D-glucopyranoside (**3a**)

5-Benzyloxycarbonylamino-pentyl β-D-glucopyranoside [2] (3.80 g, 9.52 mmol), benzaldehyde dimethylacetal (1.78 g, 11.61 mmol) and a catalytic amount of *p*-toluenesulfonic acid (0.21 g) were dissolved at 25 °C in MeCN (100 mL), and the resulting solution was stirred until TLC (toluene/acetone 2:1) showed complete consumption of the starting material (ca. 16 h). The mixture was neutralized by the addition of a few drops of triethylamine, diluted with dichloromethane (50 mL), poured into water and extracted with dichloromethane (2 × 70 mL). The combined organic phases were washed with aqueous NaHCO<sub>3</sub> solution, dried, filtered and concentrated. The resulting crystalline material was recrystallized from ethyl acetate/*n*-hexane 1:3 to give **3a** (3.30 g, 71%). All physical data were identical to those published previously for compound **3a** [2].

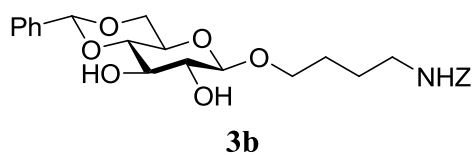

#### 4-(Benzyloxycarbonylamino)butyl 4,6-*O*-benzylidene-β-D-glucopyranoside (**3b**)

a) TMSOTf (0.14 g, 0.62 mmol) was added under stirring at −10 °C to a solution of 4-(benzyloxycarbonylamino)butanol [3] (1.39 g, 6.22 mmol) and 2,3,4,6-tetra-*O*-benzoyl-α-D-glucopyranosyl trichloroacetimidate [4] (5.07 g, 6.84 mmol) in dichloromethane (100 mL), and the mixture was stirred at −10 °C until TLC indicated that all starting material was consumed (ca. 30 min.). The mixture was neutralized by addition of a few drops of pyridine, washed with aqueous NaHCO<sub>3</sub> solution, dried, filtered and concentrated. Chromatography of the residue with toluene/acetone 10:1 afforded 4-(benzyloxycarbonylamino)butyl 2,3,4,6-tetra-*O*-benzoyl-β-D-glucopyranoside (3.8 g, 68%) as a colorless oil. [α]<sub>D</sub> +13.2 (*c* 0.5,

CHCl<sub>3</sub>); <sup>1</sup>H NMR (CDCl<sub>3</sub>) δ 8.02–7.13 (m, 25H, H<sup>Ph</sup>), 5.89 (t, 1H, *J*<sub>4,5</sub> = *J*<sub>3,4</sub> = 9.8 Hz, H-4), 5.66 (t, 1H, *J*<sub>2,3</sub> = 9.7 Hz, H-3), 5.51 (dd, 1H, *J*<sub>1,2</sub> = 7.8 Hz, H-2), 4.79 (d, 1H, H-1), 4.65 (dd, 1H, *J*<sub>6a,6b</sub> = –12.0 Hz, H-6a), 4.48 (dd, 1H, *J*<sub>5,6b</sub> = 12.13 Hz, H-6b), 4.32 (br s, 1H, NH), 4.14–4.10 (m, 1H, H-5), 3.94–3.90 (m, 1H, CH<sub>2</sub>), 3.57–3.51 (m, 1H, CH<sub>2</sub>), 3.27–3.26 (m, 1H, CH<sub>2</sub>), 3.04–3.03 (m, 1H, CH<sub>2</sub>), 1.66–1.40 (m, 6H, CH<sub>2</sub>); <sup>13</sup>C NMR (CDCl<sub>3</sub>) δ 101.3 (C-1), 78.8 (C-3), 72.2 (C-5), 71.9 (C-2), 69.8 (CH<sub>2</sub>Ph), 69.7 (C-4), 66.5 (O CH<sub>2</sub>), 63.0 (C-6); ESI-HRMS *m/z* calcd for C<sub>46</sub>H<sub>43</sub>O<sub>12</sub>NNa<sup>+</sup>: 824.26297; found: 824.26256.

b) A few drops of a 1 M solution of NaOMe in MeOH was added at 25 °C to a solution of 4-(benzyloxycarbonylamino)butyl 2,3,4,6-tetra-*O*-benzoyl-β-D-glucopyranoside (3.8 g, 4.67 mmol) in MeOH (100 mL) and the mixture was stirred for 16 h. The mixture was neutralized with Dowex H<sup>+</sup> ion-exchange resin, filtered and concentrated to give crude 4-(benzyloxycarbonylamino)butyl β-D-glucopyranoside (1.8 g, 97%), which was used without further purification in the next step.

c) A solution of 4-(benzyloxycarbonylamino)butyl β-D-glucopyranoside (1.8 g, 4.54 mmol), benzaldehyde dimethylacetal (0.85 g, 5.56 mmol) and a catalytic amount of *p*-toluenesulfonic acid in MeCN (80 mL) was treated as described for the preparation of compound **3a**. Recrystallization of the crystalline residue with ethyl acetate/*n*-hexane 1:1 gave **3b** (1.65 g, 77%). Mp 68–70 °C. [α]<sub>D</sub> –38.6 (*c* 0.5, CHCl<sub>3</sub>). <sup>1</sup>H NMR (CDCl<sub>3</sub>) δ 5.51 (s, 1H, CHPh), 5.09 (s, 2H, CH<sub>2</sub>Ph), 4.38 (d, 1H, *J*<sub>1,2</sub> = 7.8 Hz, H-1), 4.32 (dd, 1H, H-6a), 3.98–3.95, 3.83–3.73 (2m, 3H, H-5,2,4), 3.57–3.43 (m, 4H, H-3,6b, CH<sub>2</sub>O), 3.26–3.24 (m, 2H, CH<sub>2</sub>), 1.67–1.62 (m, 4H, CH<sub>2</sub>); <sup>13</sup>C NMR (CDCl<sub>3</sub>) δ 156.6 (CO), 103.4 (C-1), 101.8 (CHPh), 80.5 (C-4), 74.6 (C-2), 73.2 (C-3), 70.1 (CH<sub>2</sub>O), 68.6 (CH<sub>2</sub>O), 66.7 (C-6), 66.4 (C-5), 40.6 (CH<sub>2</sub>), 26.9, 26.2 (CH<sub>2</sub>); HRMS-FAB (*m/z*) calcd for C<sub>25</sub>H<sub>31</sub>O<sub>8</sub>NNa<sup>+</sup>: 496.1942; found: 496.2004.

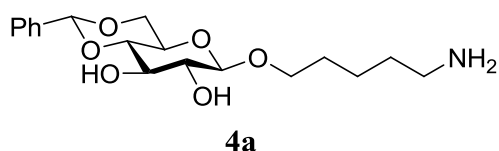

### 5-Aminopentyl 4,6-*O*-benzylidene-β-D-glucopyranoside (**4a**)

A suspension of **3a** (1.56 g, 3.2 mmol) and Pd 10% on BaCO<sub>3</sub> (ca. 20 mg) in ethanol (60 mL) was vigorously stirred at 25 °C under an atmosphere of hydrogen until TLC (acetone/toluene 3:1) revealed the complete consumption of the starting material (ca. 2 h). The mixture was

filtered through a layer of Celite<sup>®</sup> and the filtrate is concentrated to give crude **4a** (1.0 g, 91%), which was used for the next step without further purification.

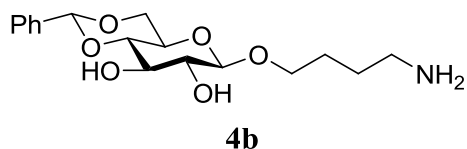

#### 4-Aminobutyl 4,6-*O*-benzylidene- $\beta$ -D-glucopyranoside (**4b**)

A suspension of **3b** (0.60 g, 1.56 mmol) and Pd 10% on BaCO<sub>3</sub> (ca. 15 mg) in ethanol (30 mL) was treated with hydrogen as described for the preparation of **4a** to give crude **4b** (0.41 g, 80%).

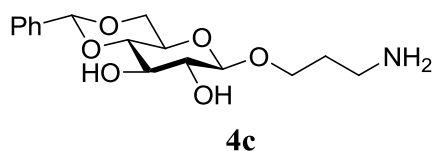

#### 3-Aminopropyl 4,6-*O*-benzylidene- $\beta$ -D-glucopyranoside (**4c**)

A suspension of **3c** [5] (0.84 g, 1.83 mmol) and Pd 10% on BaCO<sub>3</sub> (ca. 15 mg) in ethanol (40 mL) was treated with hydrogen as described for the preparation of **4a** to give crude **4c** (0.43 g, 73%).

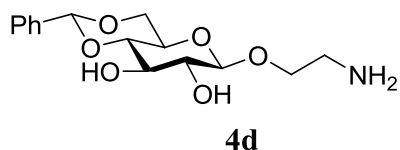

#### 2-Aminoethyl 4,6-*O*-benzylidene- $\beta$ -D-glucopyranoside (**4d**)

A suspension of **3d** [6] (0.70 g, 1.56 mmol) and Pd 10% on BaCO<sub>3</sub> (ca. 15 mg) in ethanol (30 mL) was treated with hydrogen as described for the preparation of **4a** to give crude **4d** (0.41 g, 87%).

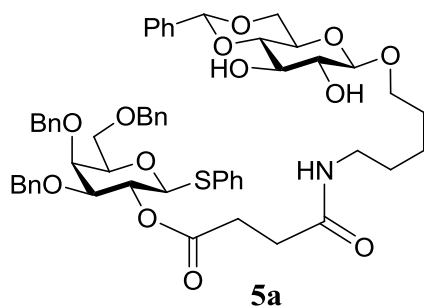

**Phenyl 2-*O*-{3-[5-(4,6-*O*-benzylidene-β-D-glucopyranos-1-yloxy)pentylaminocarbonyl]propinonyl}-3,4,6-tri-*O*-benzyl-1-thio-β-D-galactopyranoside (5a)**

A solution of **2** (1.13 g, 1.4 mmol) and **4a** (1.00 g, 2.91 mmol) in ethyl acetate (100 mL) was stirred at 25 °C until TLC (toluene/acetone 2:1) revealed the total consumption of **2** (16 h). The precipitate, which had formed in the course of the reaction, was filtered off. Recrystallization from acetone/*n*-hexane 1:3 gave **5a** (1.20 g, 88%) as colorless crystals. Mp 158–160 °C.  $[\alpha]_D -11.2$  (*c* 1, CHCl<sub>3</sub>); <sup>1</sup>H NMR (CDCl<sub>3</sub>) δ 7.43–7.12 (m, 25H, Ph), 6.09 (broad s, 1H, NH), 5.43 (s, 1H, CHPh), 5.27 (broad t, 1H,  $J_{1,2} = 9.9$ ,  $J_{2,3} = 9.9$ , H-2<sub>gal</sub>), 5.01 (d, 1H, H-1<sub>gal</sub>), 4.77 (d, 1H,  $J = -11.1$ , CH<sub>2</sub>Ph), 4.59 (d, 1H,  $J = -11.6$ , CH<sub>2</sub>Ph), 4.53 (d, 1H,  $J = -11.6$ , CH<sub>2</sub>Ph), 4.44–4.33 (m, 4H, CH<sub>2</sub>Ph, H-1<sub>glc</sub>), 4.24 (dd, 1H,  $J_{5,6a} = 4.5$ ,  $J_{6a,6b} = -10.1$ , H-6a<sub>glc</sub>), 3.90 (broad s, 1H, H-4<sub>gal</sub>), 3.77–3.31 (m, 15H, H-3,5,6a,6b<sub>gal</sub>, H-2,3,4,5,6b<sub>glc</sub>, CH<sub>2</sub>O, CH<sub>2</sub>N, CH<sub>2</sub>), 2.73–2.58 (m, 4H, CH<sub>2</sub>), 2.45 (t, 2H, CH<sub>2</sub>), 1.88–2.00 (m, 2H, CH<sub>2</sub>), <sup>13</sup>C NMR (CDCl<sub>3</sub>) δ 172.6 (COO), 171.8 (CONH), 137.9, 137.5, 129.0, 128.4, 128.3, 128.2, 128.1, 127.9, 127.8, 127.4, 126.3 (30 C, Ph), 101.8 (C-1<sub>glc</sub>), 101.0 (CHPh), 97.6 (C-1<sub>gal</sub>), 80.4 (C-4<sub>glc</sub>), 79.7 (C-3<sub>gal</sub>), 78.8 (C-4<sub>gal</sub>), 77.6 (C-2<sub>gal</sub>), 74.3 (C-2<sub>glc</sub>), 74.1 (CH<sub>2</sub>Ph), 73.2 (CH<sub>2</sub>Ph), 73.0 (C-3<sub>glc</sub>), 72.4 (CH<sub>2</sub>Ph), 71.7 (C-5<sub>gal</sub>), 69.0 (CH<sub>2</sub>O), 68.7, 68.2 (C-6<sub>glc, gal</sub>), 65.5 (C-5<sub>glc</sub>), 38.6 (CH<sub>2</sub>N), 31.6, 30.4, 29.7, 28.8, 28.6 (CH<sub>2</sub>); HRMS-FAB (*m/z*) calcd for C<sub>55</sub>H<sub>63</sub>O<sub>13</sub>NSNa<sup>+</sup>: 1000.3912; found: 1000.3997.

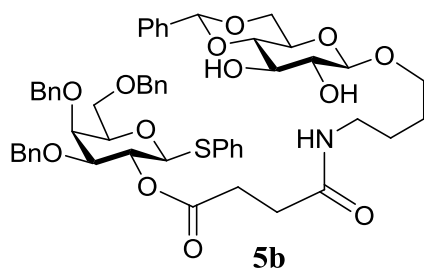

**Phenyl 2-*O*-{3-[5-(4,6-*O*-benzylidene-β-*D*-glucopyranos-1-yloxy)butylaminocarbonyl]propinonyl}-3,4,6-tri-*O*-benzyl-1-thio-β-*D*-galactopyranoside (5b)**

A solution of **2** (0.48 g, 0.6 mmol) and **4b** (0.41 g, 1.25 mmol) in ethyl acetate (60 mL) was stirred at 25 °C until TLC (toluene/acetone 2:1) revealed the total consumption of **2** (16 h). The precipitate, which had formed in the course of the reaction, was filtered off. Recrystallization from acetone/*n*-hexane 1:3 gave **5b** (0.45 g, 78%) as colorless crystals. Mp 156–158 °C.  $[\alpha]_D -8.2$  (*c* 1, CHCl<sub>3</sub>); <sup>1</sup>H NMR (CDCl<sub>3</sub>) δ 7.49–7.16 (m, 25H, Ph), 6.10 (broad t, 1H, *J* = 5.8, NH), 5.51 (s, 1H, CHPh), 5.43 (t, 1H, *J*<sub>1,2</sub> = 9.9, *J*<sub>2,3</sub> = 9.9, H-2<sub>gal</sub>), 4.92 (d, 1H, *J* = -11.5, CH<sub>2</sub>Ph), 4.64 (d, 1H, *J* = -12.0, CH<sub>2</sub>Ph), 4.59 (d, 1H, H-1<sub>gal</sub>), 4.56 (d, 1H, *J* = -11.5, CH<sub>2</sub>Ph), 4.52 (d, 1H, *J* = -12.0, CH<sub>2</sub>Ph), 4.44 (d, 1H, *J* = -11.8, CH<sub>2</sub>Ph), 4.39 (d, 1H, *J* = -11.8, CH<sub>2</sub>Ph), 4.36 (d, 1H, *J*<sub>1,2</sub> = 7.6, H-1<sub>glc</sub>), 4.31 (dd, 1H, *J*<sub>5,6a</sub> = 5.0, *J*<sub>6a,6b</sub> = -10.0, H-6a<sub>glc</sub>), 3.97–3.94 (m, 3H, CH<sub>2</sub>, H-4<sub>gal</sub>), 3.75 (t, 1H, *J*<sub>2,3</sub> = -10.3, *J*<sub>3,4</sub> = -10.3, H-3<sub>glc</sub>), 3.64 (dd, 1H, *J*<sub>5,6a</sub> = 9.1, *J*<sub>6a,6b</sub> = -12.2, H-6a<sub>gal</sub>), 3.60 (broad dd, 2H, H-6b<sub>glc,gal</sub>), 3.56–3.51 (m, 5H, CH<sub>2</sub>Ph, OH, H-4<sub>glc</sub>), 3.47 (t, 1H, H-2<sub>glc</sub>), 3.45–3.43 (m, 1H, H-5<sub>glc</sub>), 3.32–3.21 (m, 2H, CH<sub>2</sub>O), 2.71–3.52 (m, 2H, CH<sub>2</sub>N), 2.49–3.41 (m, 2H, CH<sub>2</sub>), 1.66–1.53 (m, 2H, CH<sub>2</sub>); <sup>13</sup>C NMR δ 172.0 (COO), 171.6 (CONH), 138.3, 137.6, 137.0, 133.4, 131.8, 129.1, 128.7, 128.4, 128.3, 128.0, 127.8, 127.7, 127.5, 127.4, 126.2 (30 C, Ph), 103.3 (C-1<sub>glc</sub>), 101.7 (CHPh), 86.7 (C-1<sub>gal</sub>), 86.6 (C-4<sub>glc</sub>), 81.1 (C-3<sub>gal</sub>), 80.3 (C-4<sub>gal</sub>), 77.5 (C-2<sub>gal</sub>), 74.6 (C-2<sub>glc</sub>), 74.3 (CH<sub>2</sub>Ph), 73.5 (CH<sub>2</sub>Ph), 73.4 (C-3<sub>glc</sub>), 72.8 (CH<sub>2</sub>Ph), 72.0 (C-5<sub>gal</sub>), 70.1 (CH<sub>2</sub>O), 69.9, 68.6 (C-6<sub>glc,gal</sub>), 68.5 (C-5<sub>glc</sub>), 39.1 (CH<sub>2</sub>N), 31.2, 30.8, 26.4, 25.9 (CH<sub>2</sub>); HRMS-FAB (*m/z*) calcd for C<sub>54</sub>H<sub>61</sub>O<sub>13</sub>NSNa<sup>+</sup>: 986.3756; found: 986.3703.

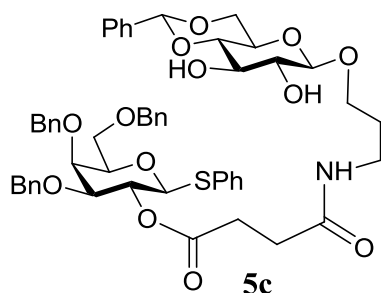

**Phenyl 2-*O*-{3-[5-(4,6-*O*-benzylidene- $\beta$ -D-glucopyranos-1-yloxy)propylaminocarbonyl]propinonyl}-3,4,6-tri-*O*-benzyl-1-thio- $\beta$ -D-galactopyranoside (5c)**

A solution of **2** (0.89 g, 1.1 mmol) and **4c** (0.72 g, 2.3 mmol) in ethyl acetate (80 mL) was stirred at 25 °C until TLC (toluene/acetone 2:1) revealed the total consumption of **2** (16 h). The precipitate, which had formed in the course of the reaction, was filtered off. Recrystallization from acetone/n-hexane 1:3 gave **5c** (0.94 g, 89%) as colorless crystals. Mp 120–122 °C.  $[\alpha]_D -10.0$  ( $c$  0.5, CHCl<sub>3</sub>); <sup>1</sup>H NMR (CDCl<sub>3</sub>)  $\delta$  7.66–7.21 (m, 25H, Ph), 6.35 (broad s, 1H, NH), 5.50 (s, 1H, CHPh), 5.40 (t, 1H,  $J_{1,2} = 9.6$ ,  $J_{2,3} = 9.8$ , H-2<sub>gal</sub>), 4.91 (d, 1H,  $J = -11.6$ , CH<sub>2</sub>Ph), 4.65–4.51 (m, 3H, CH<sub>2</sub>Ph, H-1<sub>gal</sub>), 4.44–4.35 (m, 3H, CH<sub>2</sub>Ph, H-1<sub>glc</sub>), 4.30 (dd, 1H,  $J_{5,6a} = 5.1$ ,  $J_{6a,6b} = -10.36$ , H-6a<sub>glc</sub>), 3.94 (broad s, 1H, H-4<sub>gal</sub>), 3.79–3.22 (m, 13H, H-3,5,6a,6b<sub>gal</sub>, H-2,3,4,5,6b<sub>glc</sub>, CH<sub>2</sub>O, CH<sub>2</sub>N), 2.72–2.57 (m, 2H, CH<sub>2</sub>), 1.76–1.74 (m, 2H, CH<sub>2</sub>), 1.26–1.23 (m, 1H, CH<sub>2</sub>); <sup>13</sup>C NMR (CDCl<sub>3</sub>)  $\delta$  172.1 (COO), 171.8 (CONH), 103.2 (C-1<sub>glc</sub>), 101.8 (CHPh), 86.8 (C-1<sub>gal</sub>, C-4<sub>glc</sub>), 81.1 (C-3<sub>gal</sub>), 80.4 (C-4<sub>gal</sub>), 77.6 (C-2<sub>gal</sub>), 74.7 (C-2<sub>glc</sub>), 74.4 (CH<sub>2</sub>Ph), 73.5 (CH<sub>2</sub>Ph), 73.4 (C-3<sub>glc</sub>), 72.0 (CH<sub>2</sub>Ph), 70.9 (C-5<sub>gal</sub>), 70.2 (CH<sub>2</sub>O), 68.7, 68.6 (C-6<sub>gal,glc</sub>), 68.0 (C-5<sub>glc</sub>), 36.7 (CH<sub>2</sub>N), 31.3 (CH<sub>2</sub>), 30.0 (CH<sub>2</sub>), 29.0 (CH<sub>2</sub>); HRMS-ESI  $m/z$  calcd for C<sub>53</sub>H<sub>59</sub>O<sub>13</sub>NSNa<sup>+</sup>: 972.3600; found: 972.3604.



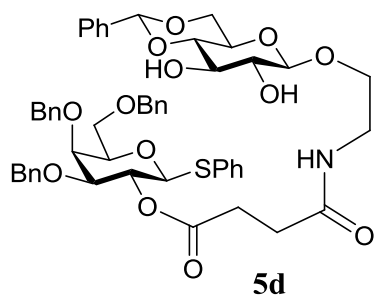

**Phenyl 2-*O*-{3-[5-(4,6-*O*-benzylidene-β-*D*-glucopyranos-1-yloxy)ethylaminocarbonyl]propinonyl}-3,4,6-tri-*O*-benzyl-1-thio-β-*D*-galactopyranoside (5d)**

A solution of **2** (0.53 g, 0.66 mmol) and **4d** (0.42 g, 1.36 mmol) in ethyl acetate (40 mL) was stirred at 25 °C until TLC (toluene/acetone 2:1) revealed the total consumption of **2** (16 h). The precipitate, which had formed in the course of the reaction, was filtered off. Recrystallization from acetone/*n*-hexane 1:3 gave **5d** (0.51 g, 83%) as colorless crystals. Mp 165–168 °C.  $[\alpha]_D -20.0$  (*c* 0.5, CHCl<sub>3</sub>); <sup>1</sup>H NMR (CDCl<sub>3</sub>) δ 7.44–7.20 (m, 25H, Ph), 6.43 (broad t, 1H, NH), 5.38 (s, 1H, CHPh), 5.41 (t, 1H,  $J_{1,2} = 9.6$ ,  $J_{2,3} = 9.7$ , H-2<sub>gal</sub>), 4.85 (d, 1H,  $J = -11.4$ , CH<sub>2</sub>Ph), 4.65 (d, 1H,  $J = -11.9$ , CH<sub>2</sub>Ph), 4.59 (d, 1H,  $J = -11.9$ , CH<sub>2</sub>Ph), 4.58–4.50 (m, 2H, CH<sub>2</sub>Ph, H-1<sub>gal</sub>), 4.42 (d, 1H,  $J = -11.4$ , CH<sub>2</sub>Ph), 4.40–4.36 (m, 2H, CH<sub>2</sub>Ph, H-1<sub>glc</sub>), 4.25 (dd, 1H,  $J_{5,6a} = 5.0$ ,  $J_{6a,6b} = -10.4$ , H-6a<sub>glc</sub>), 3.95 (broad s, 1H, H-4<sub>gal</sub>), 3.84–3.19 (m, 11H, H-3,5,6a,6b<sub>gal</sub>, H-2,3,4,5,6b<sub>glc</sub>, CH<sub>2</sub>O, CH<sub>2</sub>N), 2.91–2.75 (m, 2H, CH<sub>2</sub>), 2.67–2.58 (m, 2H, CH<sub>2</sub>); <sup>13</sup>C NMR (CDCl<sub>3</sub>) δ 173.8 (COO), 172.5 (CONH), 102.4 (C-1<sub>glc</sub>), 138.3, 138.1, 137.8, 136.9, 129.2, 128.4, 128.3, 128.3, 128.2, 128.1, 128.0, 127.8, 127.7, 127.6, 127.2, 126.2 (30 C, Ph), 101.6 (CHPh), 86.7 (C-1<sub>gal</sub>), 81.2 (C-4<sub>glc</sub>), 80.1 (C-3<sub>gal</sub>), 79.5 (C-4<sub>gal</sub>), 76.2 (C-2<sub>gal</sub>), 74.7 (C-2<sub>glc</sub>), 74.6 (CH<sub>2</sub>Ph), 74.4 (CH<sub>2</sub>Ph), 73.5 (C-3<sub>glc</sub>), 72.7 (CH<sub>2</sub>Ph), 72.5 (C-5<sub>gal</sub>), 69.3 (CH<sub>2</sub>O), 68.8, 68.6 (C-6<sub>gal,glc</sub>), 67.8 (C-5<sub>glc</sub>), 38.9 (CH<sub>2</sub>N), 25.6, 24.9 (CH<sub>2</sub>); HRMS-FAB (*m/z*) calcd for C<sub>52</sub>H<sub>57</sub>O<sub>13</sub>NSNa<sup>+</sup>: 958.3443; found: 958.3517.

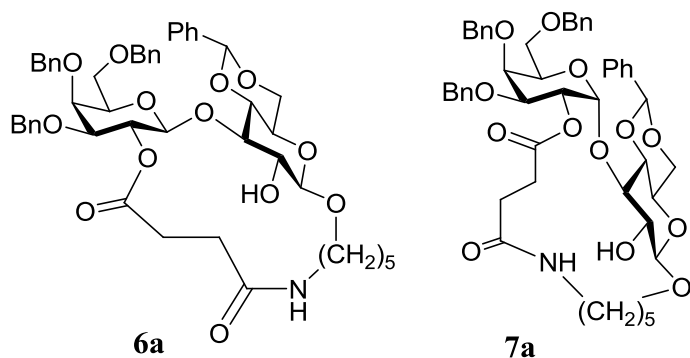

**5-Aminopentyl 3,4,5-tri-*O*-benzyl-2-*O*-(3-carboxypropionyl)- $\beta$ -D-galactopyranosyl-(1 $\rightarrow$ 3)-4,6-*O*-benzylidene- $\beta$ -D-glucopyranoside  $\pi$ -lactam (6a) and 5-aminopentyl 3,4,5-tri-*O*-benzyl-2-*O*-(3-carboxypropionyl)- $\alpha$ -D-galactopyranosyl-(1 $\rightarrow$ 3)-4,6-*O*-benzylidene- $\beta$ -D-glucopyranoside  $\pi$ -lactam (7a)**

TMSOTf (121  $\mu$ L, 0.67 mmol) was added under Ar at  $-10$   $^{\circ}$ C to a stirred mixture of **5a** (1.2 g, 1.23 mmol) and NIS (1.52 g, 6.7 mmol) in dichloromethane/acetonitrile (1:1, 100 mL), and the mixture was stirred at between  $-10$  and  $-5$   $^{\circ}$ C until TLC (toluene/acetone 2:1) revealed the complete consumption of **5a** (30–40 min). The mixture was neutralized by the addition of a few drops of triethylamine, brought to  $25$   $^{\circ}$ C, diluted with dichloromethane, washed with aqueous  $\text{Na}_2\text{S}_2\text{O}_3$  and  $\text{NaHCO}_3$  solution, dried, filtered and concentrated. Chromatography of the residue with toluene/acetone 4:1 afforded first **6a** (0.54 g, 50%) as colorless crystals. Mp  $225$ – $228$   $^{\circ}$ C (acetone/*n*-hexane 1:3).  $[\alpha]_{\text{D}} -15.0$  (*c* 1.0,  $\text{CHCl}_3$ );  $^1\text{H}$  NMR ( $\text{CDCl}_3$ )  $\delta$  7.47–7.21 (m, 20H, Ph), 5.83 (broad s, 1H, NH), 5.49 (s, 1H, CHPh), 5.31 (dd, 1H,  $J_{1,2} = 10.0$ ,  $J_{2,3} = 8.1$ , H-2<sub>gal</sub>), 4.89 (d, 1H,  $J = -11.7$ , CH<sub>2</sub>Ph), 4.63 (d, 1H, H-1<sub>gal</sub>), 4.62 (d, 1H,  $J = -11.5$ , CH<sub>2</sub>Ph), 4.62 (d, 1H, CH<sub>2</sub>Ph), 4.48 (d, 1H,  $J = -12.1$ , PhCH<sub>2</sub>), 4.38 (m, 1H, H-6a<sub>glc</sub>), 4.34 (d, 1H,  $J_{1,2} = 7.5$ , H-1<sub>glc</sub>), 4.31–4.28 (m, 2H, CH<sub>2</sub>Ph), 3.97 (d, 1H,  $J_{4,5} = 2.5$ , H-4<sub>gal</sub>), 3.94–3.90 (m, 1H, OCH<sub>2</sub>), 3.74–3.34 (m, 10H, H-3,5,6a,6b<sub>gal</sub>, H-2,3,4,5,6b<sub>glc</sub>, CH<sub>2</sub>O), 2.87–2.74 (m, 2H, CH<sub>2</sub>), 2.40–2.35 (m, 2H, CH<sub>2</sub>), 1.78–1.39 (m, 10H, CH<sub>2</sub>);  $^{13}\text{C}$  NMR ( $\text{CDCl}_3$ )  $\delta$  173.0 (COO), 172.3 (CONH), 138.6, 138.0, 137.8, 137.5, 128.6, 128.4, 128.3, 128.1, 128.0, 127.9, 127.8, 127.7, 127.4, 127.2, 126.2, 126.0 (24 C, Ph), 103.2 (C-1<sub>gal</sub>), 103.1 (C-1<sub>glc</sub>), 100.7 (CHPh), 82.9 (C-3<sub>glc</sub>), 80.0 (C-3<sub>gal</sub>), 79.6 (C-4<sub>glc</sub>), 74.5 (CH<sub>2</sub>Ph), 73.9 (C-2<sub>glc</sub>), 73.7 (C-2<sub>gal</sub>), 73.6 (CH<sub>2</sub>Ph), 73.1 (C-5<sub>gal</sub>), 72.5 (C-4<sub>gal</sub>), 72.0 (CH<sub>2</sub>Ph), 69.4 (CH<sub>2</sub>O), 68.7 (C-6<sub>gal</sub>), 68.0 (C-6<sub>glc</sub>), 66.0 (C-5<sub>glc</sub>), 38.9 (CH<sub>2</sub>COO), 29.7 (CH<sub>2</sub>CON), 29.7, 29.1, 27.1 (CH<sub>2</sub>). HRMS-ESI  $m/z$  calcd for  $\text{C}_{49}\text{H}_{57}\text{O}_{13}\text{NNa}^+$ : 890.3723; found: 890.3727.

Eluted next was **7a** (53 mg, 6%) as colorless crystals. Mp 170–172 °C (acetone/*n*-hexane 1:3).  $[\alpha]_D -8.6$  (*c* 1.0, CHCl<sub>3</sub>); <sup>1</sup>H NMR (CDCl<sub>3</sub>) δ 7.49–7.09 (m, 20H, Ph), 6.19 (broad s, 1H, NH) 5.49 (s, 1H, CHPh), 5.32 (dd, 1H,  $J_{1,2} = 6.0$ ,  $J_{2,3} = 8.4$ , H-2<sub>gal</sub>), 5.08 (d, 1H, H-1<sub>gal</sub>), 4.85 (d, 1H,  $J = -11.6$ , CH<sub>2</sub>Ph), 4.63 (d, 1H,  $J = -10.4$ , CH<sub>2</sub>Ph), 4.49–4.43 (m, 4 H, CH<sub>2</sub>Ph, H-1<sub>glc</sub>), 4.30 (dd, 1H,  $J_{6a,6b} = -10.6$ , H-6a<sub>glc</sub>), 3.95 (broad s, 1H, H-4<sub>gal</sub>), 3.82–3.37 (m, 11H, H-3,5,6a,6b<sub>gal</sub>, H-2,3,4,5,6b<sub>glc</sub>, CH<sub>2</sub>O), 2.92 (d, 1H, CH<sub>2</sub>), 2.76–2.69 (m, 1H, CH<sub>2</sub>), 2.54–2.39 (m, 2H, CH<sub>2</sub>), 2.25–2.20 (m, 1H, CH<sub>2</sub>); <sup>13</sup>C NMR (CDCl<sub>3</sub>) δ 171.6 (COO), 170.9 (CONH), 136.8, 136.5, 136.2, 131.5, 128.1, 127.5, 127.4, 127.3, 127.2, 126.9, 126.8, 126.7, 125.3 (24 C, Ph), 101.8 (C-1<sub>glc</sub>), 100.6 (CHPh), 96.6 (C-1<sub>gal</sub>), 79.4 (C-3<sub>gal</sub>), 77.7 (C-3<sub>glc</sub>), 76.5 (C-4<sub>glc</sub>), 73.3 (C-2<sub>gal</sub>), 73.0 (CH<sub>2</sub>Ph), 72.5 (CH<sub>2</sub>Ph), 72.0 (C-2<sub>glc</sub>), 71.4 (C-4<sub>glc</sub>), 71.3 (CH<sub>2</sub>Ph), 70.6 (C-5<sub>gal</sub>), 68.0 (C-6<sub>glc</sub>), 67.7 (C-6<sub>gal</sub>), 67.2 (C-5<sub>glc</sub>), 64.9 (CH<sub>2</sub>O), 37.6 (CH<sub>2</sub>COO), 30.6 (CH<sub>2</sub>N), 29.3, 28.7, 27.6 (CH<sub>2</sub>). HRMS-ESI *m/z* calcd for C<sub>49</sub>H<sub>57</sub>O<sub>13</sub>NNa: 890.3723; found: 890.3721.

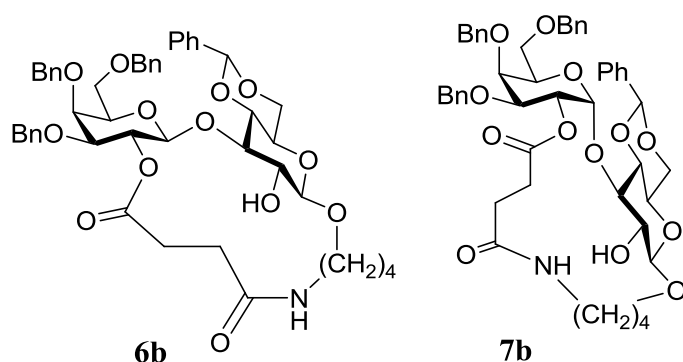

**4-Aminobutyl 3,4,5-tri-*O*-benzyl-2-*O*-(3-carboxypropionyl)-β-D-galactopyranosyl-(1→3)-4,6-*O*-benzylidene-β-D-glucopyranoside *o*-lactam (**6b**) and 4-aminobutyl 3,4,5-tri-*O*-benzyl-2-*O*-(3-carboxypropionyl)-α-D-galactopyranosyl-(1→3)-4,6-*O*-benzylidene-β-D-glucopyranoside *o*-lactam (**7b**)**

Treatment of a suspension of **5b** (0.41 g, 0.43 mmol) and NIS (0.53 g, 2.34 mmol) in dichloromethane (30 mL) with TMSOTf (42 μL, 0.23 mmol) at –10 °C as described for the preparation of **6a** followed by chromatography with dichloromethane/acetone/toluene 4:1:1 gave first **6b** (0.21 g, 58%) as colorless crystals. Mp 210–212 °C (acetone/*n*-hexane 1:3).  $[\alpha]_D -13.0$  (*c* 1.0, CHCl<sub>3</sub>); <sup>1</sup>H NMR (CDCl<sub>3</sub>) δ 7.73–7.23 (m, 20H, Ph), 6.04 (broad s, 1H, NH), 5.51 (s, 1H, CHPh), 5.39 (dd, 1H,  $J_{1,2} = 7.8$ ,  $J_{2,3} = 9.9$ , H-2<sub>gal</sub>), 4.92 (d, 1H,  $J = -11.6$ , CH<sub>2</sub>Ph), 4.74 (d, 1H, H-1<sub>gal</sub>), 4.65–4.56 (m, 7H, CH<sub>2</sub>Ph, H-1,6a<sub>glc</sub>), 3.97 (d, 1H,  $J_{4,5} = 3.3$ , H-4<sub>gal</sub>), 3.91–3.38 (m, 11H, H-2,3,4,5,6b<sub>glc</sub>, H-3,5,6a,6b<sub>gal</sub>, CH<sub>2</sub>O), 3.07–3.04 (m, 2H, CH<sub>2</sub>N), 2.79–2.65 (m, 8H, CH<sub>2</sub>); <sup>13</sup>C NMR (CDCl<sub>3</sub>) δ 173.0 (COO), 172.3 (CONH), 138.5–125.3 (24

C, Ph), 102.8 (C-1<sub>gal</sub>), 102.6 (C-1<sub>glc</sub>), 100.6 (CHPh), 82.6 (C-3<sub>glc</sub>), 80.1 (C-3<sub>gal</sub>), 79.8 (C-4<sub>glc</sub>), 74.4 (CH<sub>2</sub>Ph), 73.8 (C-4<sub>gal</sub>), 73.5 (2 C, CH<sub>2</sub>Ph, C-5<sub>gal</sub>), 72.7 (C-2<sub>gal</sub>), 72.1 (C-2<sub>glc</sub>), 71.8 (CH<sub>2</sub>Ph) 68.6 (C-6<sub>gal</sub>), 68.1 (C-6<sub>glc</sub>), 67.7 (CH<sub>2</sub>O), 66.6 (C-5<sub>glc</sub>), 26.3, 29.6, 30.4, 38.9 (CH<sub>2</sub>); HRMS-FAB (*m/z*) calcd for C<sub>48</sub>H<sub>55</sub>O<sub>13</sub>NNa<sup>+</sup>: 876.3566; found: 876.3580.

Eluted next was **7b** (40 mg, 8%) as colorless crystals. Mp 205–207 °C (acetone/*n*-hexane 1:3). [ $\alpha$ ]<sub>D</sub> –23.0 (*c* 1.0, CHCl<sub>3</sub>); <sup>1</sup>H NMR (CDCl<sub>3</sub>)  $\delta$  7.48–7.24 (m, 20H, Ph), 5.85 (broad s, 1H, NH), 5.72 (d, 1H, *J*<sub>1,2</sub> = 3.9, H-1<sub>gal</sub>), 5.41 (s, 1H, CHPh), 5.22 (d, 1H, *J*<sub>2,3</sub> = 10.6, H-2<sub>gal</sub>), 4.90 (d, 1H, *J* = –11.5, CH<sub>2</sub>Ph), 4.72–4.40 (m, 8H, CH<sub>2</sub>Ph, H-1<sub>glc</sub>), 4.29 (dd, 1H, *J*<sub>6a,6b</sub> = –10.2, H-6a<sub>glc</sub>), 4.00 (d, 1H, *J*<sub>4,5</sub> = 4.9, H-4<sub>gal</sub>), 3.83–3.49 (m, 11H, H-3,5,6a,6b<sub>gal</sub>, H-2,3,4,5,6b<sub>glc</sub>, CH<sub>2</sub>O), 3.06–2.97 (m, 1H, CH<sub>2</sub>), 2.83–2.79 (broad d, 1H, CH<sub>2</sub>), 2.57–2.25 (m, 4H, CH<sub>2</sub>), 1.68–1.51 (m, 8H, CH<sub>2</sub>); <sup>13</sup>C NMR (CDCl<sub>3</sub>)  $\delta$  172.9 (COO), 172.1 (CONH), 138.4–124.6 (24 C, Ph), 104.0 (C-1<sub>glc</sub>), 101.6 (CHPh), 94.7 (C-1<sub>gal</sub>), 81.2 (C-3<sub>gal</sub>), 76.9 (C-4<sub>gal</sub>), 75.7 (C-4<sub>glc</sub>), 74.6 (CH<sub>2</sub>Ph), 73.5 (C-3<sub>glc</sub>), 72.8 (CH<sub>2</sub>Ph), 72.6 (C-2<sub>glc</sub>), 72.3 (CH<sub>2</sub>Ph), 72.0 (C-2<sub>gal</sub>), 69.8 (C-6<sub>glc</sub>), 69.3 (C-6<sub>gal</sub>), 68.7 (CH<sub>2</sub>O), 68.6 (C-5<sub>gal</sub>), 65.5 (C-5<sub>glc</sub>); HRMS-FAB (*m/z*) calcd for C<sub>48</sub>H<sub>55</sub>O<sub>13</sub>NNa<sup>+</sup>: 876.3566; found: 876.3597.

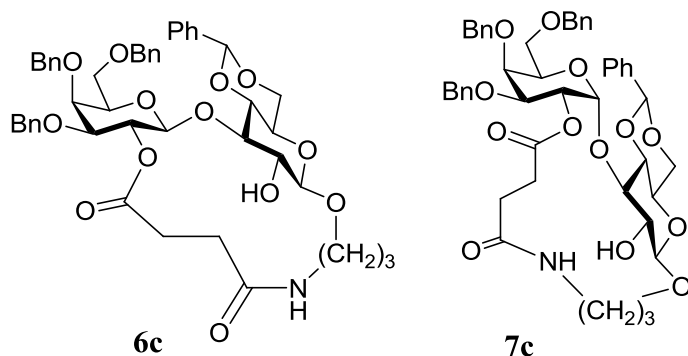

**3-Aminopropyl 3,4,5-tri-*O*-benzyl-2-*O*-(3-carboxypropionyl)-β-D-galactopyranosyl-(1→3)-4,6-*O*-benzylidene-β-D-glucopyranoside ξ-lactam (**6c**) and 3-aminopropyl 3,4,5-tri-*O*-benzyl-2-*O*-(3-carboxypropionyl)-α-D-galactopyranosyl-(1→3)-4,6-*O*-benzylidene-β-D-glucopyranoside ξ-lactam (**7c**)**

Treatment of a suspension of **5c** (0.65 g, 0.68 mmol) and NIS (0.53 g, 2.34 mmol) in dichloromethane/acetonitrile (60 mL) with TMSOTf (42 μL, 0.23 mmol) at –5 °C as described for the preparation of **6a** followed by chromatography with dichloromethane/acetone/toluene 5:2:1 gave first **6c** (0.33 g, 58%) as colorless crystals. Mp

218–221 °C (acetone/*n*-hexane 1:3).  $[\alpha]_D -11.0$  (*c* 1.0, CHCl<sub>3</sub>); <sup>1</sup>H NMR (CDCl<sub>3</sub>) δ 7.48–7.18 (m, 20H, Ph), 5.95 (broad d, 1H, NH), 5.50 (s, 1H, CHPh), 5.25 (dd, 1H,  $J_{2,3} = 7.6$ ,  $J_{3,4} = 7.8$ , H-2<sub>gal</sub>), 4.74–4.53 (m, 6H, H-1<sub>gal</sub>, H-1<sub>glc</sub>, CH<sub>2</sub>Ph), 4.41 (t, 2H,  $J = -11.9$ , CH<sub>2</sub>Ph), 4.31 (dd, 1H,  $J_{6a,6b} = -10.4$ , H-6a<sub>glc</sub>), 3.98 (d, 1H,  $J = 2.5$ , H-4<sub>gal</sub>), 3.74–3.33 (m, 11H, H-3,5,6a,6b<sub>gal</sub>, H-2,3,4,5,6b<sub>glc</sub>, CH<sub>2</sub>O), 3.04–2.87 (m, 1H, CH<sub>2</sub>), 2.88–2.80 (m, 2H, CH<sub>2</sub>), 2.43–2.34 (m, 2H, CH<sub>2</sub>), 2.45–2.28 (m, 2H, CH<sub>2</sub>); <sup>13</sup>C NMR (CDCl<sub>3</sub>) δ 173.2 (COO), 172.6 (CONH), 137.8–126.3 (24 C, Ph), 102.7 (C-1<sub>gal</sub>), 102.2 (C-1<sub>glc</sub>), 100.3 (CHPh), 82.3 (C-3<sub>glc</sub>), 79.9 (C-3<sub>gal</sub>), 78.7 (C-4<sub>glc</sub>), 74.3 (CH<sub>2</sub>Ph), 74.1 (C-2<sub>gal</sub>), 73.6 (CH<sub>2</sub>Ph), 73.1 (C-5<sub>gal</sub>), 72.8 (C-4<sub>gal</sub>), 72.3 (CH<sub>2</sub>Ph), 70.8 (C-2<sub>glc</sub>), 68.5 (C-6<sub>glc</sub>), 68.2 (C-6<sub>gal</sub>), 66.3 (C-5<sub>glc</sub>); HRMS-FAB (*m/z*) calcd for C<sub>47</sub>H<sub>53</sub>O<sub>13</sub>NNa<sup>+</sup>: 862.3410; found: 862.3445.

Eluted next was **7c** contaminated by traces of **6c** (90 mg, 15%) as amorphous solid. <sup>1</sup>H NMR (CDCl<sub>3</sub>) δ 7.48–7.18 (m, 20H, Ph), 5.95 (broad d, 1H, NH), 5.50 (s, 1H, CHPh), 5.25 (dd, 1H,  $J_{2,3} = 7.6$ ,  $J_{3,4} = 7.9$ , H-2<sub>gal</sub>), 4.74–4.53 (m, 6H, H-1<sub>gal</sub>, H-1<sub>glc</sub>, CH<sub>2</sub>Ph), 4.45 (t, 2H,  $J = -11.9$ , CH<sub>2</sub>Ph), 4.31 (dd, 1H,  $J_{6a,6b} = -10.4$ , H-6a<sub>glc</sub>), 3.98 (d, 1H,  $J_{4,5} = 2.5$ , H-4<sub>gal</sub>), 3.74–3.33 (m, 11H, H-3,5,6a,6b<sub>gal</sub>, H-2,3,4,5,6b<sub>glc</sub>, CH<sub>2</sub>O), 3.04–2.87 (m, 1H, CH<sub>2</sub>), 2.88–2.80 (m, 2H, CH<sub>2</sub>), 2.43–2.34 (m, 2H, CH<sub>2</sub>), 2.45–2.28 (m, 2H, CH<sub>2</sub>); <sup>13</sup>C NMR (CDCl<sub>3</sub>) δ 173.2 (COO), 172.6 (CONH), 102.2 (C-1<sub>glc</sub>), 100.3 (CHPh), 95.4 (C-1<sub>gal</sub>), 82.3 (C-3<sub>glc</sub>), 79.9 (C-3<sub>gal</sub>), 78.7 (C-4<sub>glc</sub>), 74.3 (CH<sub>2</sub>Ph), 74.1 (C-2<sub>gal</sub>), 73.6 (CH<sub>2</sub>Ph), 73.1 (C-5<sub>gal</sub>), 72.8 (C-4<sub>gal</sub>), 72.3 (CH<sub>2</sub>Ph), 70.8 (C-2<sub>glc</sub>), 68.5 (C-6<sub>glc</sub>), 68.2 (C-6<sub>gal</sub>), 66.3 (C-5<sub>glc</sub>).

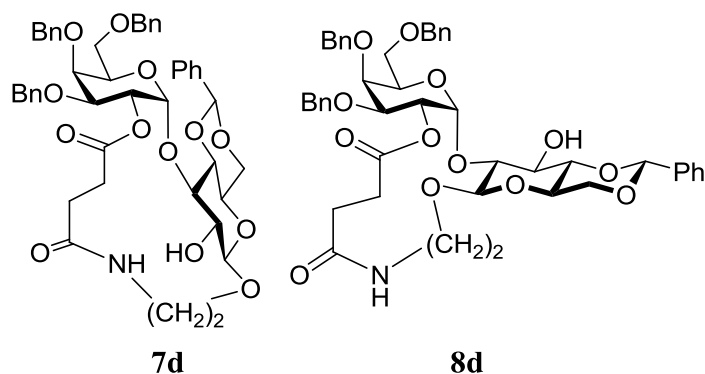

**2-Aminoethyl 3,4,5-tri-*O*-benzyl-2-*O*-(3-carboxypropionyl)- $\alpha$ -D-galactopyranosyl-(1 $\rightarrow$ 3)-4,6-*O*-benzylidene- $\beta$ -D-glucopyranoside v-lactam (7d) and 2-aminoethyl 3,4,5-tri-*O*-benzyl-2-*O*-(3-carboxypropionyl)- $\alpha$ -D-galactopyranosyl-(1 $\rightarrow$ 2)-4,6-*O*-benzylidene- $\beta$ -D-glucopyranoside  $\mu$ -lactam (8d)**

Treatment of a suspension of **5d** (0.44 g, 0.47 mmol) and NIS (0.58 g, 2.57 mmol) in dichloromethane/acetonitrile (60 mL) with TMSOTf (46  $\mu$ L, 0.26 mmol) at  $-5^\circ\text{C}$  as described for the preparation of **6a** followed by chromatography with dichloromethane/acetone/toluene 5:2:1 gave first **8d** (0.23 g, 59%) as colorless crystals. Mp  $209\text{--}212^\circ\text{C}$  (acetone/*n*-hexane 1:3).  $[\alpha]_{\text{D}} +6.0$  (*c* 1.0,  $\text{CHCl}_3$ );  $^1\text{H}$  NMR ( $\text{CDCl}_3$ )  $\delta$  7.50–7.24 (m, 20H, Ph), 6.35 (broad d, 1H, NH), 5.54 (s, 1H, CHPh), 5.50 (dd, 1H,  $J_{2,3} = 9.7$ ,  $J_{3,4} = 9.7$ , H-2<sub>gal</sub>), 4.84 (br dd, 2H,  $\text{CH}_2\text{Ph}$ , H-1<sub>gal</sub>), 4.61 (br dd, 2H,  $\text{CH}_2\text{Ph}$ ), 4.46–4.40 (m, 3H,  $\text{CH}_2\text{Ph}$ , H-1<sub>glc</sub>), 4.35–4.29 (m, 3H,  $\text{CH}_2\text{Ph}$ , H-6a<sub>glc</sub>), 3.96 (t, 1H,  $J_{2,3} = 9.3$ ,  $J_{3,4} = 9.3$ , H-3<sub>gal</sub>), 3.91 (d, 1H,  $J_{4,5} = 2.7$ , H-4<sub>gal</sub>), 3.84–3.36 (m, 12H, H-5,6a,6b<sub>gal</sub>, H-2,3,4,5,6b<sub>glc</sub>,  $\text{CH}_2\text{O}$ ), 3.01–2.95 (m, 1H,  $\text{CH}_2$ ), 2.77–2.67 (m, 1H,  $\text{CH}_2$ ), 2.58–2.42 (m, 2H,  $\text{CH}_2$ ), 2.27–2.22 (m, 1H,  $\text{CH}_2$ );  $^{13}\text{C}$  NMR ( $\text{CDCl}_3$ )  $\delta$  172.7 (COO), 172.1 (CONH), 137.9–126.5 (24 C, Ph), 101.9 (CHPh), 99.9 (C-1<sub>glc</sub>), 97.3 (C-1<sub>gal</sub>), 81.0 (C-3<sub>glc</sub>), 80.5 (C-2<sub>glc</sub>), 80.1 (C-4<sub>glc</sub>), 74.4 ( $\text{CH}_2\text{Ph}$ ), 74.1 (C-5<sub>gal</sub>), 73.7 ( $\text{CH}_2\text{Ph}$ ), 72.9 ( $\text{CH}_2\text{Ph}$ ), 71.5 (C-4<sub>gal</sub>), 70.9 (C-2<sub>gal</sub>), 70.9 (C-3<sub>gal</sub>), 68.6 (C-6<sub>glc</sub>), 68.1 (C-6<sub>gal</sub>), 67.0 ( $\text{CH}_2\text{O}$ ), 65.8 (C-5<sub>glc</sub>), 39.2 ( $\text{CH}_2$ ), 31.9 ( $\text{CH}_2$ ), 31.7 ( $\text{CH}_2$ ), 31.0 ( $\text{CH}_2$ ); HRMS-FAB (*m/z*) calcd for  $\text{C}_{46}\text{H}_{51}\text{O}_{13}\text{NNa}^+$ : 848.3253; found: 848.3288.

Eluted next was **7d** (50 mg, 13%) as colorless crystals. Mp  $148\text{--}150^\circ\text{C}$  (acetone/*n*-hexane 1:3).  $[\alpha]_{\text{D}} +2.0$  (*c* 1.0,  $\text{CHCl}_3$ );  $^1\text{H}$  NMR ( $\text{CDCl}_3$ )  $\delta$  7.50–7.25 (m, 20H, Ph), 6.35 (br d, 1H, NH), 5.54 (s, 1H, CHPh), 5.50 (t, 1H,  $J_{2,3} = 9.1$ ,  $J_{3,4} = 9.1$ , H-2<sub>gal</sub>), 4.87 (d, 1H,  $J = -11.9$ ,  $\text{CH}_2\text{Ph}$ ), 4.82 (d, 1H,  $J_{1,2} = 7.8$ , H-1<sub>gal</sub>), 4.64–4.56 (m, 2H,  $\text{CH}_2\text{Ph}$ ), 4.47–4.41 (m, 2H,  $\text{CH}_2\text{Ph}$ , H-1<sub>glc</sub>), 4.32 (dd, 1H,  $J_{6a,6b} = -13.1$ , H-6a<sub>glc</sub>), 3.97 (t, 1H,  $J_{3,4} = 8.8$ , H-3<sub>gal</sub>), 3.92 (d, 1H,  $J_{4,5} =$

1.5, H-4<sub>gal</sub>), 3.85–3.36 (m, 10H, H-5,6a,6b<sub>gal</sub>, H-2,3,4,5,6b<sub>glc</sub>, CH<sub>2</sub>O), 3.02–2.95 (m, 1H, CH<sub>2</sub>O), 2.77–2.68 (m, 1H, CH<sub>2</sub>), 2.59–2.43 (m, 2H, CH<sub>2</sub>), 2.28–2.23 (m, 1H, CH<sub>2</sub>); <sup>13</sup>C NMR (CDCl<sub>3</sub>) δ 172.6 (COO), 172.0 (CONH), 137.9–126.5 (24 C, Ph), 101.8 (CHPh), 99.8 (C-1<sub>glc</sub>), 97.2 (C-1<sub>gal</sub>), 80.9 (C-3<sub>glc</sub>), 80.4 (C-2<sub>glc</sub>), 80.0 (C-4<sub>glc</sub>), 74.7 (C-5<sub>gal</sub>), 74.3 (CH<sub>2</sub>Ph), 74.0 (CH<sub>2</sub>Ph), 72.1 (CH<sub>2</sub>Ph), 71.3 (C-4<sub>gal</sub>), 70.9 (C-3<sub>gal</sub>), 70.8 (C-2<sub>gal</sub>), 68.5 (C-6<sub>gal</sub>), 68.0 (CH<sub>2</sub>O), 66.9 (C-6<sub>glc</sub>), 65.7 (C-5<sub>glc</sub>), 39.1 (CH<sub>2</sub>), 31.8, 31.6, 30.9 (CH<sub>2</sub>); HRMS-FAB (*m/z*) calcd for C<sub>46</sub>H<sub>51</sub>O<sub>13</sub>NNa<sup>+</sup>: 848.3253; found: 848.3205.

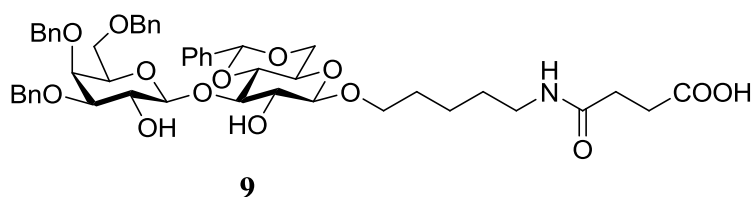

**5-(3-Hydroxycarbonylpropanamido)pentyl 3,4,6-tri-*O*-benzyl-β-D-galactopyranosyl-(1→3)-4,6-*O*-benzylidene-β-D-glucopyranoside (**9**)**

A few drops of a 1 M solution of NaOMe in MeOH was added at 50 °C to a solution of **6a** (0.35 g, 0.40 mmol) in toluene/MeOH 1:1 (20 mL), and the solution was stirred at 60 °C for 3 h. The solution was cooled to rt, neutralized with Dowex 50W X8 ion-exchange resin (H<sup>+</sup> form), filtered and concentrated. Chromatography of the residue with toluene/MeOH 3:1 gave **9** (0.30 g, 84%) as a colorless amorphous solid. [α]<sub>D</sub> −16.0 (*c* 1.0, CHCl<sub>3</sub>); <sup>1</sup>H NMR (CDCl<sub>3</sub>) δ 7.49–7.23 (m, 20H, Ph), 5.94 (d, 1H, *J* = 7.8, H-1<sub>gal</sub>), 5.63 (s, 1H, CHPh), 4.87 (d, 1H, *J* = −11.1, CH<sub>2</sub>Ph), 4.57–4.44 (m, 3H, CH<sub>2</sub>Ph, H-1<sub>glc</sub>), 4.27 (brs, 2H, NH), 4.08 (br s, 1H, H-4<sub>gal</sub>), 3.79–3.08 (m, 17H, H-2,3,5,6a,6b, OH<sub>gal</sub>, H-2,3,4,5,6a,6b, OH<sub>glc</sub>, CH<sub>2</sub>O, CH<sub>2</sub>), 2.41–2.35 (m, 2H, CH<sub>2</sub>), 1.70–1.57 (m, 6H, CH<sub>2</sub>); <sup>13</sup>C NMR (CDCl<sub>3</sub>) δ 172.4 (CONH), 157.7 (CO), 105.8 (C-1<sub>gal</sub>), 103.6 (C-1<sub>glc</sub>), 100.4 (CHPh), 83.6 (C-3<sub>glc</sub>), 82.5 (C-3<sub>gal</sub>), 79.4 (C-4<sub>glc</sub>), 75.0 (CH<sub>2</sub>Ph), 74.6 (C-2<sub>gal</sub>), 73.4 (C-2<sub>glc</sub>), 73.3 (CH<sub>2</sub>Ph), 72.5 (C-4<sub>gal</sub>), 72.4 (CH<sub>2</sub>Ph), 71.2 (C-5<sub>gal</sub>), 69.8 (C-6<sub>gal</sub>), 69.8 (C-6<sub>glc</sub>), 67.9 (CH<sub>2</sub>O), 66.6 (C-5<sub>glc</sub>), 34.3, 31.9, 31.6, 29.8, 26.3, 25.4, 23.7 (CH<sub>2</sub>); HRMS-ESI *m/z* calcd for C<sub>49</sub>H<sub>59</sub>O<sub>14</sub>NNa<sup>+</sup>: 908.38283; found: 908.38278.

## References

1. Ziegler, T.; Dettmann, R.; Ariffadhillah; Zettl, U. *J. Carbohydr. Chem.* **1999**, *18*, 1079–1095. doi:[10.1080/07328309908544056](https://doi.org/10.1080/07328309908544056)
2. Eckhardt, E.; Ziegler, T. *Carbohydr. Res.* **1994**, *264*, 253–269. doi:[10.1016/S0008-6215\(05\)80010-2](https://doi.org/10.1016/S0008-6215(05)80010-2)
3. Sengupta, D.; Blaskó, A.; Bruice, T. C. *Bioorg. Med. Chem.* **1996**, *4*, 803–813. doi:[10.1016/0968-0896\(96\)00070-3](https://doi.org/10.1016/0968-0896(96)00070-3)
4. Ziegler, T.; Jurisch, K. *Tetrahedron: Asymmetry* **2000**, *11*, 3403–3418. doi:[10.1016/S0957-4166\(00\)00294-9](https://doi.org/10.1016/S0957-4166(00)00294-9)
5. Wang, Y.; Yan, Q.; Wu, J.; Zhang, L.-H.; Ye, X.-S. *Tetrahedron* **2005**, *61*, 4313–4321. doi:[10.1016/j.tet.2005.02.023](https://doi.org/10.1016/j.tet.2005.02.023)
6. Hanessian, S.; Tremblay, M.; Kornienko, A.; Moitessier, N. *Tetrahedron* **2001**, *57*, 3255–3265. doi:[10.1016/S0040-4020\(01\)00194-6](https://doi.org/10.1016/S0040-4020(01)00194-6)
